# Supplementary material for: Cost-effectiveness of Housing First Intervention With Intensive Case Management Compared With Treatment as Usual for Homeless Adults With Mental Illness: Secondary Analysis of a Randomized Clinical Trial
Source: PubMed Central journal article supplement (PMC6707012; doi:10.1001/jamanetworkopen.2019.9782), 2019-08-21
Supplement: jamanetwopen-2-e199782-s001.pdf [file jamanetwopen-2-e199782-s001.pdf]

## Supplementary Online Content

Latimer EA, Rabouin D, Cao Z, et al; At Home/Chez Soi Investigators. Cost-effectiveness of Housing First intervention with Intensive Case Management compared with treatment as usual for homeless adults with mental illness: secondary analysis of a randomized clinical trial. *JAMA Netw Open*. 2019;2(8):e199782. doi:10.1001/jamanetworkopen.2019.9782

**eFigure 1.** Flowchart Showing Selection of Study Participants

**eFigure 2.** Bootstrap Replicates on the Cost-effectiveness Plane

**eTable 1.** Net Benefit Regression Results, Assigning Different Values to an Additional Day of Stable Housing Without Interaction Terms

**eTable 2.** Two-Way Sensitivity Analysis: ICER and 95% CI as a Function of Discount Rate and Whether an Adjustment Is Made for Baseline Differences

This supplementary material has been provided by the authors to give readers additional information about their work.

**eFigure 1. Flowchart Showing Selection of Study Participants**

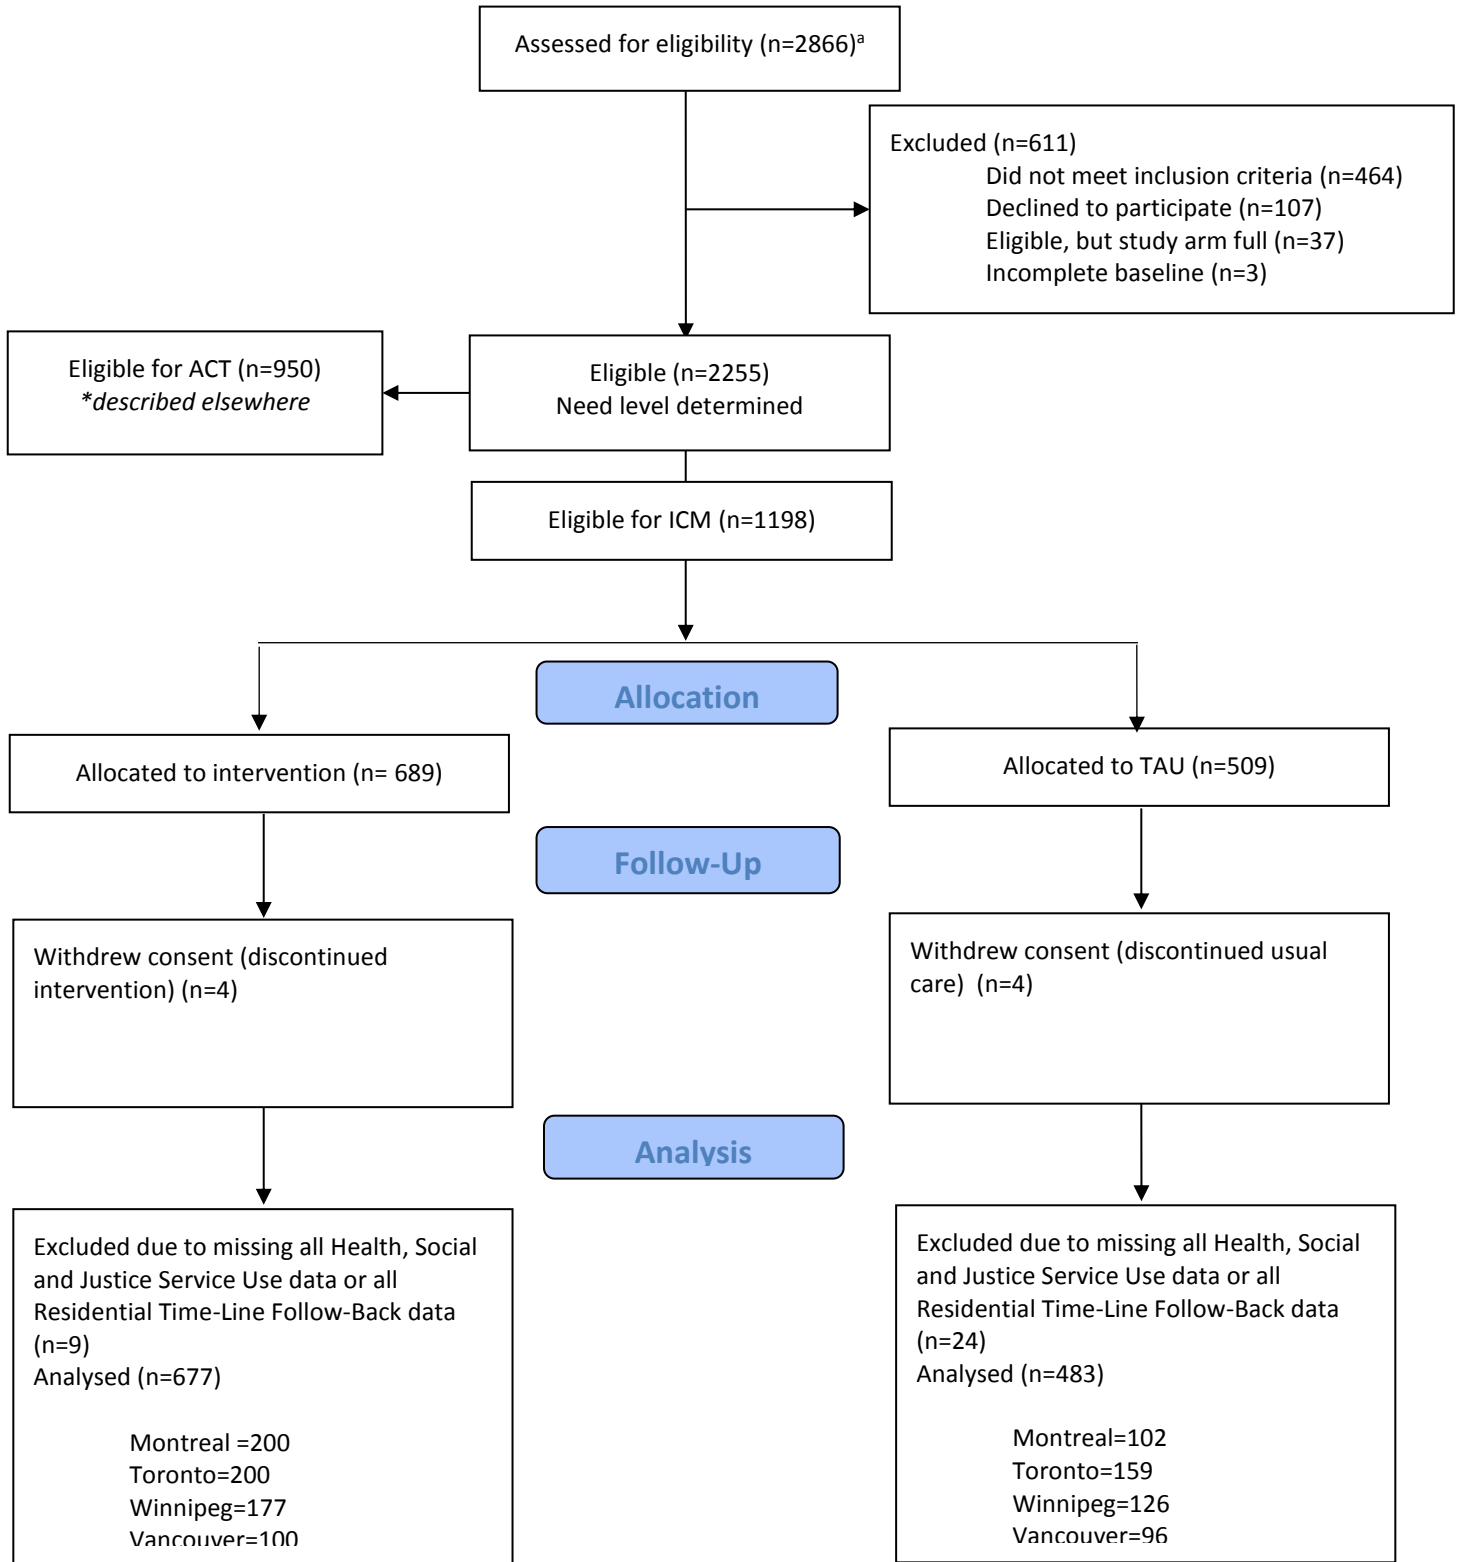

Abbreviations: ACT, Assertive Community Treatment; ICM, Intensive Case Management; TAU, Treatment as usual.

<sup>a</sup>The number of participants assessed for eligibility is an estimate as some sites employed pre-screening and did not document those who were excluded through this process.

**eFigure 2. Bootstrap Replicates on the Cost-effectiveness Plane**

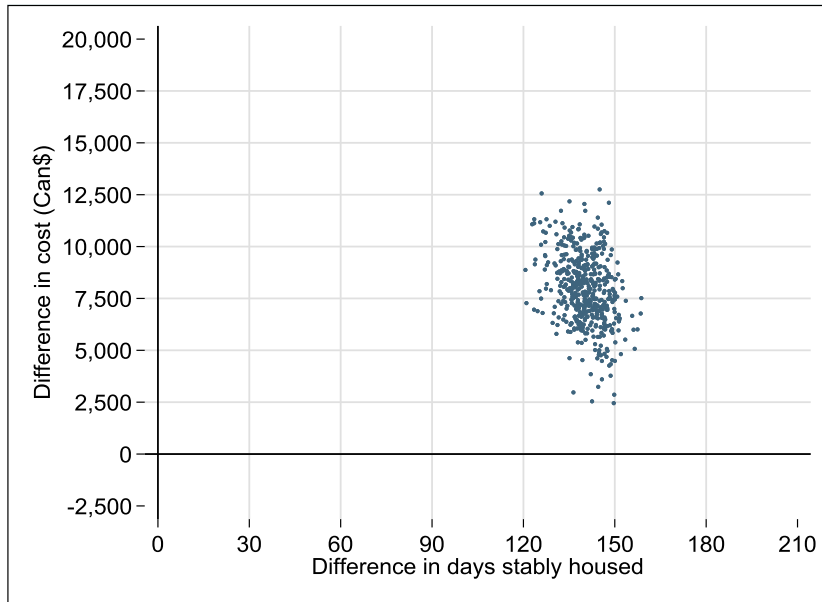

The original number of days stably housed and the total cost for each Housing First and Treatment as Usual participant are used to calculate the difference in average number of days stably housed between the Housing First and Treatment as Usual groups (Housing First minus Treatment as Usual), and the difference in average total costs. These two differences can be plotted on the cost-effectiveness plane; their ratio is the incremental cost-effectiveness ratio. To assess the variability in that ratio, 500 bootstrap samples are drawn. (A bootstrap sample is randomly drawn with replacement from the original set of cost-effect pairs, so that it has the same number of experimental and control group cost-effect pairs as in the original sample.) For each bootstrap sample, the difference in days stably housed and in total costs is computed and plotted. The cost-effectiveness acceptability curve (Figure 1) can then be derived from this figure.

**eTable 1. Net Benefit Regression Results, Assigning Different Values to an Additional Day of Stable Housing Without Interaction Terms<sup>a,b</sup>**

|                                                       | $\lambda^c = \$0$ |                  |         | $\lambda = \$20$ |                  |         | $\lambda = \$40$ |                   |         |
|-------------------------------------------------------|-------------------|------------------|---------|------------------|------------------|---------|------------------|-------------------|---------|
|                                                       | b                 | 95% C.I.         |         | b                | 95% C.I.         |         | b                | 95% C.I.          |         |
| HF                                                    | -8,604            | -12,027          | -5,181  | -5,830           | -9,321           | -2,338  | -3,055           | -6,631            | 522     |
| Toronto <sup>d</sup>                                  | -2,361            | -7,085           | 2,363   | -2,174           | -6,977           | 2,629   | -1,987           | -6,891            | 2,916   |
| Winnipeg <sup>d</sup>                                 | 1,198             | -3,793           | 6,189   | 375              | -4,705           | 5,454   | -449             | -5,640            | 4,743   |
| Vancouver <sup>d</sup>                                | 242               | -5,332           | 5,815   | -382             | -6,068           | 5,304   | -1,006           | -6,829            | 4,816   |
| Age 30-49 <sup>e</sup>                                | 2,941             | -1,877           | 7,759   | 3,158            | -1,743           | 8,059   | 3,374            | -1,631            | 8,380   |
| Age 50+ <sup>e</sup>                                  | 3,996             | -1,655           | 9,647   | 4,304            | -1,454           | 10,062  | 4,612            | -1,278            | 10,502  |
| Female                                                | -3,871            | -7,617           | -124    | -3,682           | -7,495           | 132     | -3,492           | -7,389            | 405     |
| Alcohol or Substance abuse or dependence <sup>f</sup> | 647               | -3,265           | 4,559   | 685              | -3,290           | 4,659   | 722              | -3,331            | 4,776   |
| MCAS score/10 <sup>g</sup>                            | 918               | -1,910           | 3,746   | 1,260            | -1,622           | 4,142   | 1,602            | -1,346            | 4,550   |
| Hospitalization history <sup>h</sup>                  | -3,639            | -7,843           | 565     | -3,447           | -7,730           | 836     | -3,255           | -7,635            | 1,125   |
| Arrest history <sup>i</sup>                           | -9,748            | -13,678          | -5,818  | -10,334          | -14,338          | -6,330  | -10,920          | -15,015           | -6,824  |
| Longest period homeless <sup>j</sup>                  | -12               | -53              | 29      | -15              | -57              | 27      | -18              | -61               | 25      |
| Constant                                              | -43,338           | -63,403          | -23,273 | -43,024          | -63,470          | -22,578 | -42,709          | -63,624           | -21,795 |
|                                                       |                   | $\lambda = \$60$ |         |                  | $\lambda = \$80$ |         |                  | $\lambda = \$100$ |         |
| HF                                                    | -280              | -3,957           | 3,396   | 2,494            | -1,296           | 6,285   | 5,269            | 1,352             | 9,186   |
| Toronto                                               | -1,801            | -6,824           | 3,223   | -1,614           | -6,776           | 3,549   | -1,427           | -6,745            | 3,891   |
| Winnipeg                                              | -1,272            | -6,597           | 4,053   | -2,095           | -7,573           | 3,383   | -2,918           | -8,567            | 2,731   |
| Vancouver                                             | -1,630            | -7,612           | 4,352   | -2,254           | -8,416           | 3,909   | -2,877           | -9,239            | 3,484   |
| Age 30-49                                             | 3,591             | -1,539           | 8,721   | 3,807            | -1,466           | 9,081   | 4,024            | -1,411            | 9,459   |
| Age 50+                                               | 4,919             | -1,126           | 10,965  | 5,227            | -995             | 11,449  | 5,535            | -884              | 11,953  |
| Female                                                | -3,303            | -7,299           | 693     | -3,114           | -7,222           | 995     | -2,924           | -7,159            | 1,310   |
| Alcohol or Substance abuse or dependence              | 760               | -3,389           | 4,909   | 798              | -3,460           | 5,056   | 835              | -3,545            | 5,216   |
| MCAS score/10                                         | 1,944             | -1,081           | 4,969   | 2,286            | -827             | 5,400   | 2,629            | -583              | 5,840   |
| Hospitalization history                               | -3,063            | -7,557           | 1,431   | -2,871           | -7,495           | 1,752   | -2,679           | -7,446            | 2,088   |
| Arrest history                                        | -11,506           | -15,708          | -7,303  | -12,092          | -16,416          | -7,767  | -12,678          | -17,138           | -8,217  |
| Longest period homeless                               | -21               | -65              | 23      | -24              | -69              | 21      | -27              | -73               | 20      |
| Constant                                              | -42,395           | -63,861          | -20,930 | -42,081          | -64,173          | -19,989 | -41,767          | -64,554           | -18,979 |

**Abbreviations:** C.I., confidence interval; MCAS, Multnomah Community Ability Scale.

**Notes:** <sup>a</sup> N=1160; data are given in 2016 Canadian dollars; <sup>b</sup> Models estimated with net monetary benefit not adjusted for baseline differences in costs – dependent variable is  $(d_i \cdot \lambda) - c_i$ , where  $d_i$  is participant  $i$ 's annualized number of days stably housed and  $c_i$  the corresponding total cost; <sup>c</sup> Decision-maker's willingness to pay for an additional day stably housed; <sup>d</sup> Montreal is the reference category; <sup>e</sup> Age less than 30 is the reference category; <sup>f</sup> No alcohol or substance abuse or dependence is the reference category; <sup>g</sup> Coefficients indicate partial association with a 10-point increase in MCAS score; <sup>h</sup> 2 or more hospitalizations for mental illness over a one-year period during the five years before baseline; <sup>i</sup> one or more arrests or incarcerations in the 6 months before baseline; <sup>j</sup> Over lifetime, in months.

**eTable 2. Two-Way Sensitivity Analysis: ICER and 95% CI as a Function of Discount Rate and Whether an Adjustment is Made for Baseline Differences**

|                                               | Discount rate          |                        |                        |
|-----------------------------------------------|------------------------|------------------------|------------------------|
|                                               | 0%                     | 3%                     | 5%                     |
| <b>No adjustment for baseline differences</b> | \$55.84 (30.25, 84.59) | \$56.08 (29.55, 84.78) | \$55.41 (29.95, 84.09) |
| <b>Adjustment for baseline differences</b>    | \$59.67 (34.61, 87.08) | \$60.18 (35.27, 86.95) | \$59.27 (34.36, 85.88) |
